# Supplementary material
Source: HighWire-hosted journal article supplement (https://erj.ersjournals.com/content/54/3/1801512)
Supplement: inline-supplementary-material-2 [file inline-supplementary-material-2.pdf]

## APPENDIX 2.

### Diagnostic work up for acute respiratory failure

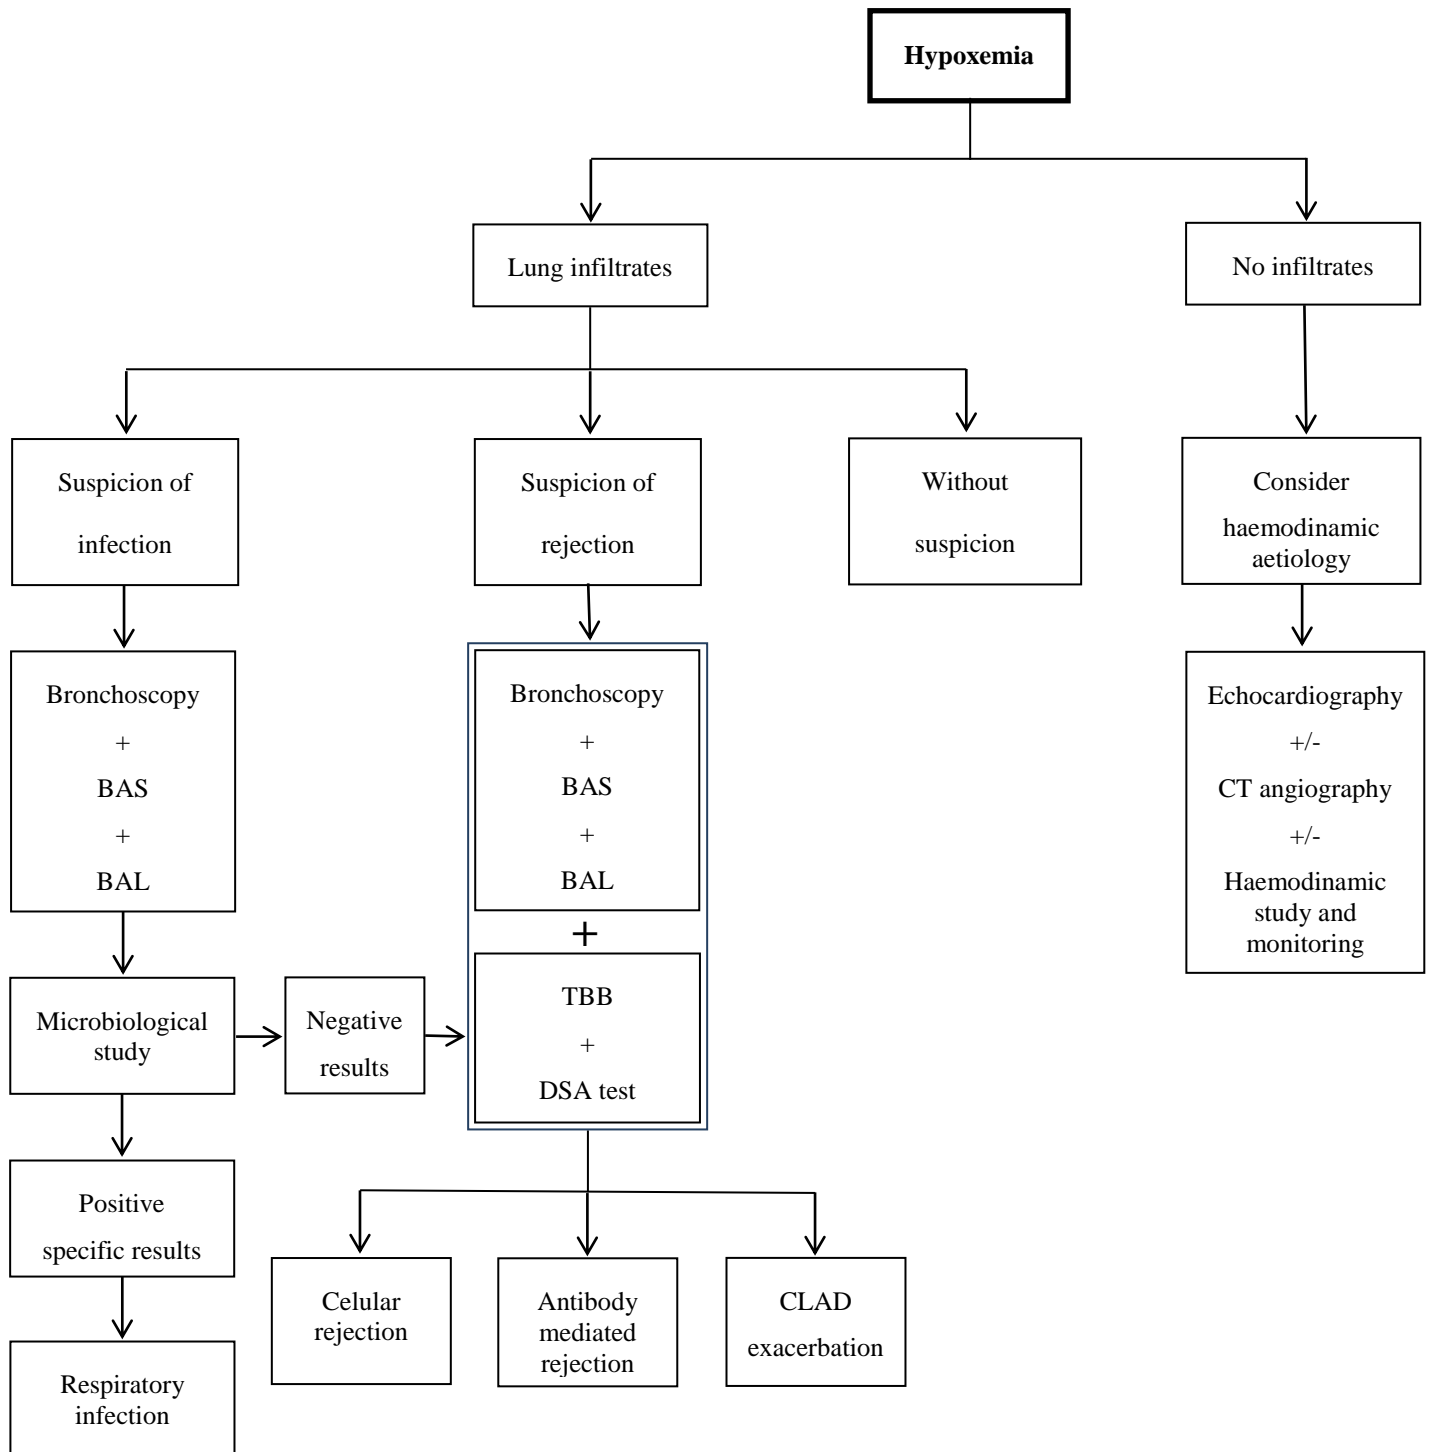

Bronchoalveolar aspirate, BAS; Bronchoalveolar lavage, BAL; Transbronchial biopsy, TBB; Donor specific antibodies, DSA; Computed tomography, CT
