# Supplementary material
Source: HighWire-hosted journal article supplement (https://erj.ersjournals.com/content/54/3/1801512)

**SUPPLEMENTARY FIGURE S1.** Hosmer and Lemeshow goodness of fit (GOF).

Data: modfin\$y, fitted(modfin)

X-squared = 2.3759, df = 10, p-value = 0.9926

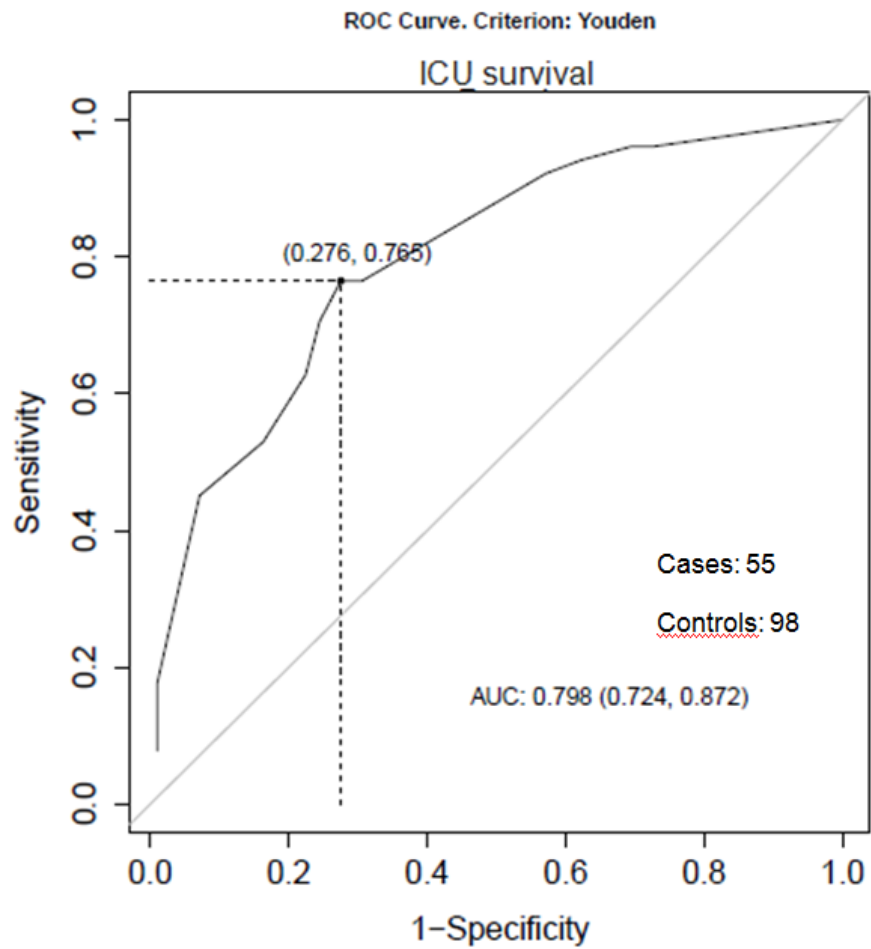

Supplement: inline-supplementary-material-4 [file inline-supplementary-material-4.pdf]
