# Supplementary material
Source: HighWire-hosted journal article supplement (https://erj.ersjournals.com/content/54/3/1801512)
Supplement: inline-supplementary-material-5 [file inline-supplementary-material-5.pdf]

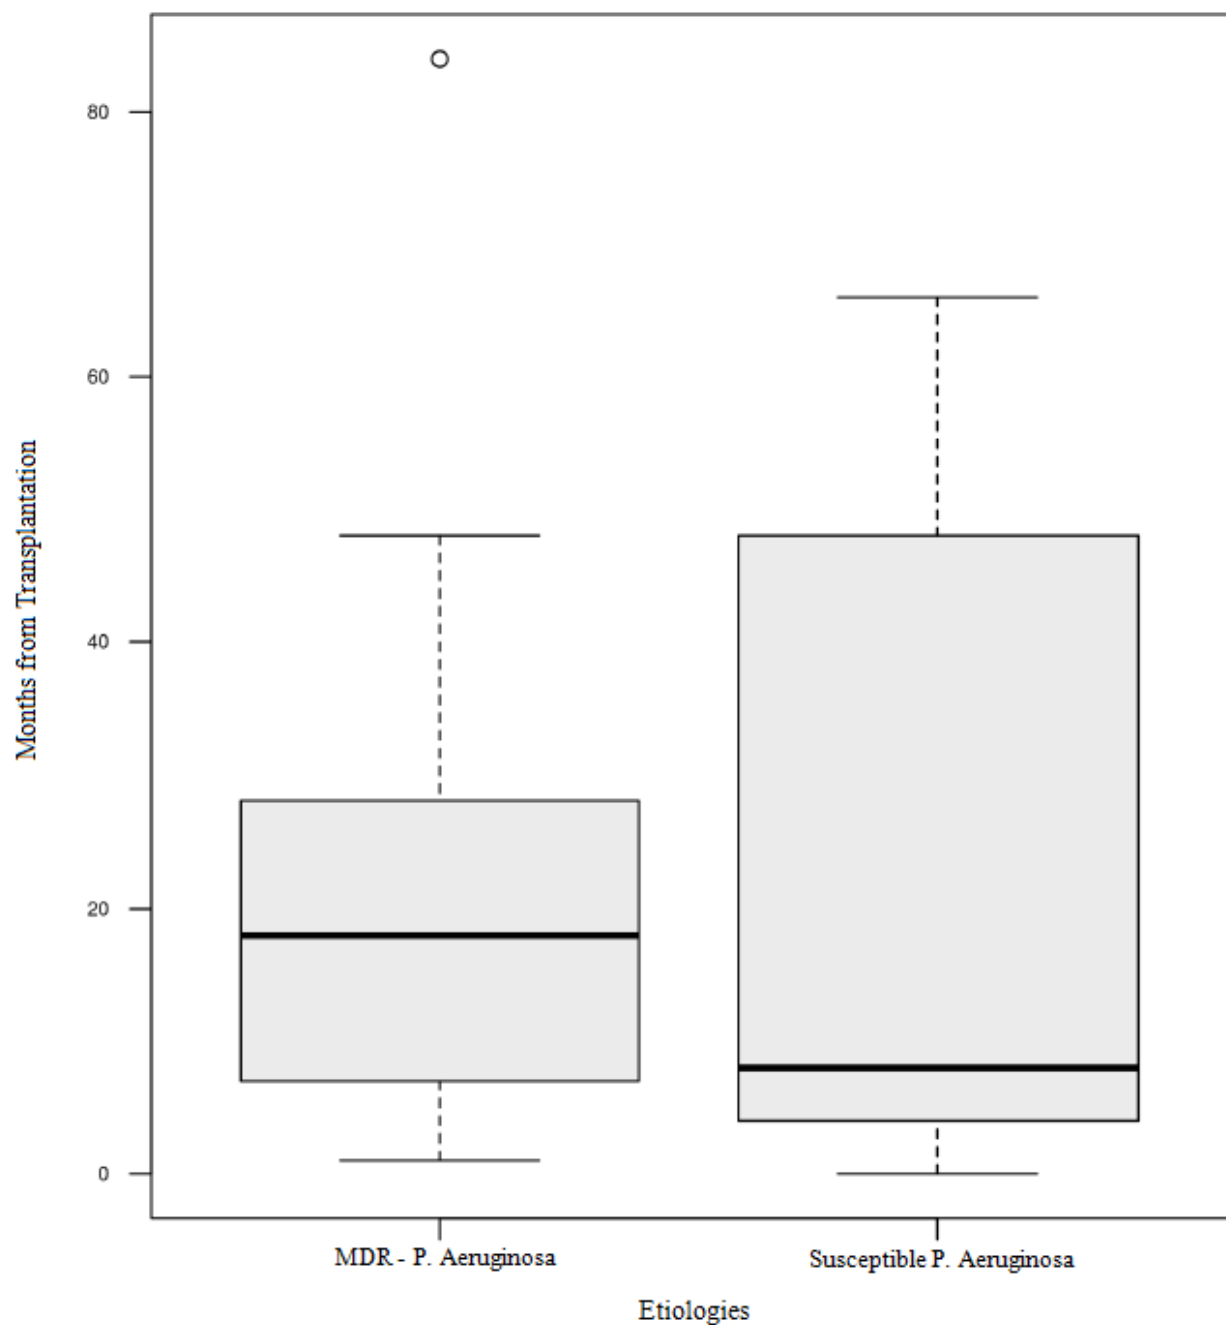

**Supplementary Fig S2.** Chronology of the pattern of susceptibility of *P. aeruginosa* (multi-drug resistant vs susceptible) of the ICU readmissions due to pneumonia in lung transplant recipients according to time after transplantation.
