# Supplementary material
Source: HighWire-hosted journal article supplement (https://erj.ersjournals.com/content/54/3/1801512)
Supplement: inline-supplementary-material-7 [file inline-supplementary-material-7.pdf]

| <b>SUPPLEMENTARY TABLE S2</b>                   |             | Lung transplants performed in adults during study period. |             |             |             |              |
|-------------------------------------------------|-------------|-----------------------------------------------------------|-------------|-------------|-------------|--------------|
| <b>Investigator site</b>                        | <b>2012</b> | <b>2013</b>                                               | <b>2014</b> | <b>2015</b> | <b>2016</b> | <b>Total</b> |
| Vall d'Hebron                                   | 66          | 69                                                        | 67          | 58          | 73          | <b>333</b>   |
| Marqués de Valdecilla                           | 34          | 49                                                        | 36          | 48          | 39          | <b>206</b>   |
| CHUAC                                           | 35          | 42                                                        | 26          | 47          | 39          | <b>189</b>   |
| 12 de Octubre                                   | 18          | 25                                                        | 30          | 31          | 30          | <b>134</b>   |
| Reina Sofía                                     | 24          | 34                                                        | 26          | 35          | 33          | <b>152</b>   |
| <b>Total annual in the 5 hospitals</b>          | <b>177</b>  | <b>219</b>                                                | <b>185</b>  | <b>219</b>  | <b>214</b>  | <b>1014</b>  |
| Total annual in Spain                           | 238         | 285                                                       | 262         | 294         | 307         | <b>1386</b>  |
| Source: National Transplant Organisation, Spain |             |                                                           |             |             |             |              |
