# Supplementary material
Source: HighWire-hosted journal article supplement (https://erj.ersjournals.com/content/54/3/1801512)
Supplement: inline-supplementary-material-9 [file inline-supplementary-material-9.pdf]

| SUPPLEMENTARY TABLE S4                                                          |             | Cox model using the delay of ICU mortality. |          |     |       |
|---------------------------------------------------------------------------------|-------------|---------------------------------------------|----------|-----|-------|
| COX Model                                                                       | Coefficient | Exp(coef)                                   | Se(coef) | z   | p     |
| IMV requirement at ICUr                                                         | 1.22        | 3.38                                        | 0.43     | 2.9 | 0.004 |
| Vasopressor requirement                                                         | 0.57        | 1.77                                        | 0.33     | 1.7 | 0.08  |
| Pneumonia                                                                       | 0.80        | 2.23                                        | 0.33     | 2.4 | 0.01  |
| Preadmission diagnosis of CLAD                                                  | 0.74        | 2.1                                         | 0.3      | 2.5 | 0.01  |
| Likelihood ratio test=37.2 on 4 df, p=1.65e-07                                  |             |                                             |          |     |       |
| n= 153, number of events= 54                                                    |             |                                             |          |     |       |
| IMV, Invasive mechanical ventilation; CLAD, Chronic lung allograft dysfunction. |             |                                             |          |     |       |
