# Supplementary material
Source: HighWire-hosted journal article supplement (https://erj.ersjournals.com/content/54/3/1801512)
Supplement: inline-supplementary-material-10 [file inline-supplementary-material-10.pdf]

| SUPPLEMENTARY TABLE S5                                                                                   |  | Characteristics of 21 recurrent ICU readmissions. |
|----------------------------------------------------------------------------------------------------------|--|---------------------------------------------------|
| Age                                                                                                      |  | 55 [44-59]                                        |
| Male gender                                                                                              |  | 12 (57.1)                                         |
| <b>Pre-transplant lung disease</b>                                                                       |  |                                                   |
| Chronic obstructive pulmonary disease                                                                    |  | 9 (42.8)                                          |
| Idiopathic pulmonary fibrosis                                                                            |  | 6 (28.6)                                          |
| Diffuse interstitial lung disease                                                                        |  | 2 (9.5)                                           |
| Histiocytosis X                                                                                          |  | 2 (9.5)                                           |
| Cystic fibrosis                                                                                          |  | 1 (4.8)                                           |
| Bronchiectasis                                                                                           |  | 1 (4.8)                                           |
| <b>Type of LT</b>                                                                                        |  |                                                   |
| Bilateral                                                                                                |  | 9 (42.8)                                          |
| Left                                                                                                     |  | 6 (28.6)                                          |
| Right                                                                                                    |  | 6 (28.6)                                          |
| <b>History of early<sup>a</sup> complications after LT<sup>+</sup></b>                                   |  |                                                   |
| Primary graft dysfunction                                                                                |  | 6 (28.6)                                          |
| Acute rejection                                                                                          |  | 6 (28.6)                                          |
| AKI                                                                                                      |  | 6 (28.6)                                          |
| Pneumonia                                                                                                |  | 5 (23.8)                                          |
| Phrenic paresis                                                                                          |  | 4 (19)                                            |
| Haemorrhage                                                                                              |  | 3 (14.3)                                          |
| CMV replication                                                                                          |  | 2 (9.5)                                           |
| Tracheobronchitis                                                                                        |  | 1 (4.8)                                           |
| Suture stenosis                                                                                          |  | 1 (4.8)                                           |
| Gastroparesis                                                                                            |  | 1 (4.8)                                           |
| <b>History of late<sup>b</sup> complications after LT<sup>+</sup></b>                                    |  |                                                   |
| Infection                                                                                                |  | 8 (38.1)                                          |
| Diabetes mellitus                                                                                        |  | 7 (33.3)                                          |
| CLAD                                                                                                     |  | 6 (28.6)                                          |
| History of acute rejection episode                                                                       |  | 6 (28.6)                                          |
| Chronic kidney disease                                                                                   |  | 6 (28.6)                                          |
| Bronchial stenosis                                                                                       |  | 3 (14.3)                                          |
| High blood pressure                                                                                      |  | 3 (14.3)                                          |
| Osteoporosis                                                                                             |  | 1 (4.8)                                           |
| <b>Time since previous ICUr, days</b>                                                                    |  | 46 [15-209]                                       |
| <b>APACHE II score</b>                                                                                   |  | 23 [18-30]                                        |
| <b>SOFA score</b>                                                                                        |  | 7 [4-9]                                           |
| <b>Last FEV<sub>1</sub>, %</b>                                                                           |  | 42 [36.8-52.3]                                    |
| <b>Last FVC, %</b>                                                                                       |  | 55 [42-67]                                        |
| <b>ICU stay, days</b>                                                                                    |  | 8 [5-10]                                          |
| <b>Hospital stay, days</b>                                                                               |  | 22.5 [19.5-29.5]                                  |
| <b>Indication for ICUr</b>                                                                               |  |                                                   |
| ARF                                                                                                      |  | 15 (71.3)                                         |
| Shock                                                                                                    |  | 3 (14.3)                                          |
| Other <sup>c</sup>                                                                                       |  | 3 (14.3)                                          |
| <b>Conditions in patients with ICUr<sup>a</sup></b>                                                      |  |                                                   |
| Infection                                                                                                |  | 10 (47.6)                                         |
| Pneumonia                                                                                                |  | 9 (42.8)                                          |
| Sepsis                                                                                                   |  | 8 (38.1)                                          |
| Septic Shock                                                                                             |  | 8 (38.1)                                          |
| <b>Causes of ARF at ICUr</b>                                                                             |  |                                                   |
| Pneumonia                                                                                                |  | 9 (58.8)                                          |
| Acute pulmonary oedema                                                                                   |  | 1 (6.7)                                           |
| Acute rejection                                                                                          |  | 1 (6.7)                                           |
| Pulmonary thromboembolism                                                                                |  | 1 (6.7)                                           |
| Hemoptysis                                                                                               |  | 1 (6.7)                                           |
| Neumonitis                                                                                               |  | 1 (6.7)                                           |
| Unknown                                                                                                  |  | 1 (6.7)                                           |
| <b>Techniques and Support</b>                                                                            |  |                                                   |
| IMV requirement                                                                                          |  | 17 (81)                                           |
| Duration of IMV, days                                                                                    |  | 6 [3-18]                                          |
| Vasopressor requirement                                                                                  |  | 9 (42.8)                                          |
| <b>Deaths in ICU</b>                                                                                     |  | 12 (57.1)                                         |
| <b>Cause of ICU death</b>                                                                                |  |                                                   |
| Multi-organ failure                                                                                      |  | 8 (66.7) <sup>d</sup>                             |
| Refractory hypoxemia                                                                                     |  | 3 (25) <sup>d</sup>                               |
| Brain death                                                                                              |  | 1 (8.3) <sup>d</sup>                              |
| <b>Deaths in hospital</b>                                                                                |  | 13 (61.9)                                         |
| Data are presented as median [Interquartile range (IQR)] or Number/Total (%) unless otherwise indicated. |  |                                                   |

LT, Lung transplant; AKI, Acute kidney injury; CMV, Cytomegalovirus; CLAD, Chronic lung allograft dysfunction; ICUr, ICU readmission; APACHE II, Acute Physiology and Chronic Health Evaluation II; SOFA, Sequential Organ Failure Assessment; FEV<sub>1</sub>, Forced expiratory volume in the first second; FVC, Forced vital capacity; ARF, Acute respiratory failure; IMV, Invasive mechanical ventilation.

<sup>†</sup>More than one complication in some cases.

<sup>a</sup> Admission diagnoses are not mutually exclusive.

<sup>a</sup>Immediate post-operative period.

<sup>b</sup>After ICU discharge

<sup>c</sup>It encompasses categories with 1 patients.

<sup>d</sup>Proportion of ICU deaths.
