# Supplementary material
Source: HighWire-hosted journal article supplement (https://erj.ersjournals.com/content/54/3/1801512)
Supplement: inline-supplementary-material-11 [file inline-supplementary-material-11.pdf]

| SUPPLEMENTARY TABLE S6                   |  | Characteristics of 153 lung transplant patients readmitted to ICU. |
|------------------------------------------|--|--------------------------------------------------------------------|
| <b>Time after LT at ICUr, months</b>     |  | 6 [2-25]                                                           |
| <b>APACHE II score</b>                   |  | 19 [15-24]                                                         |
| <b>SOFA score</b>                        |  | 5.00 [3-8]                                                         |
| <b>Last FEV<sub>1</sub>, %</b>           |  | 42 [16-58]                                                         |
| <b>Last FVC, %</b>                       |  | 46 [29-65]                                                         |
| <b>ICU stay, days</b>                    |  | 7 [4-20]                                                           |
| <b>Hospital stay, days</b>               |  | 8.5 [4-33.2]                                                       |
| <b>Indication for ICUr</b>               |  |                                                                    |
| ARF                                      |  | 110/153 (71.9)                                                     |
| Shock                                    |  | 9/153 (5.9)                                                        |
| Post-operative                           |  | 8/153 (5.2)                                                        |
| Neurologic compromise                    |  | 5/153 (3.3)                                                        |
| Other <sup>a</sup>                       |  | 21/153 (13.7)                                                      |
| <b>Conditions in patients with ICUr+</b> |  |                                                                    |
| Infection                                |  | 75/153 (49)                                                        |
| Pneumonia                                |  | 56/153 (36.6)                                                      |
| Sepsis                                   |  | 55/153 (35.9)                                                      |
| Septic Shock                             |  | 40/153 (26.1)                                                      |
| <b>Causes of ARF at ICUr</b>             |  | 110                                                                |
| Pneumonia                                |  | 50/110 (45.5)                                                      |
| Acute pulmonary oedema                   |  | 8/110 (7.3)                                                        |
| Bronchial stenosis                       |  | 7/110 (6.4)                                                        |
| Acute rejection                          |  | 6/110 (5.5)                                                        |
| Exacerbation of CLAD                     |  | 6/110 (5.5)                                                        |
| Pneumothorax                             |  | 6/110 (5.5)                                                        |
| Pulmonary thromboembolism                |  | 4/110 (3.5)                                                        |
| Other <sup>a</sup>                       |  | 23/110 (20.8)                                                      |
| <b>Techniques and Support</b>            |  |                                                                    |
| IMV requirement                          |  | 95/153 (62.1)                                                      |
| Duration of IMV, days                    |  | 9 [2.4-23]                                                         |
| Duration of IMV >72 h                    |  | 63/153 (41.2)                                                      |
| HFNC                                     |  | 48/153 (31.4)                                                      |
| Non-IMV                                  |  | 28/153 (18.3)                                                      |
| Prone-positioning therapy                |  | 9/153 (5.9)                                                        |
| Fiberoptic bronchoscopy performed        |  | 69/153 (45.1)                                                      |
| Tracheostomy performed                   |  | 42/153 (27.5)                                                      |
| Corticosteroids                          |  | 14/153 (9.2)                                                       |
| Vasopressor requirement                  |  | 40/153 (26.1)                                                      |
| <b>Deaths in ICU</b>                     |  | 55/153 (35.9)                                                      |
| <b>Cause of ICU death</b>                |  |                                                                    |
| Multi-organ failure                      |  | 27/153 (49.1) <sup>b</sup>                                         |
| Refractory hypoxemia                     |  | 25/153 (45.5) <sup>b</sup>                                         |
| Other <sup>a</sup>                       |  | 3/153 (5.5) <sup>b</sup>                                           |
| <b>Deaths in hospital</b>                |  | 69/153 (45.1)                                                      |

Data are presented as median [Interquartile range (IQR)] or Number/Total (%) unless otherwise indicated. ICUr, ICU readmission; APACHE II, Acute Physiology and Chronic Health Evaluation II; SOFA, Sequential Organ Failure Assessment; FEV<sub>1</sub>, Forced expiratory volume in the first second; FVC, Forced vital capacity; ARF, Acute respiratory failure; CLAD, Chronic lung allograft dysfunction; IMV, Invasive mechanical ventilation; HFNC, High flow nasal cannula.

<sup>a</sup> Admission diagnoses are not mutually exclusive.

<sup>a</sup>It encompasses all categories with ≤3 patients.

<sup>b</sup>Proportion of ICU deaths.
